# Supplementary material
Source: Springer Nature journal article supplement (https://www.springermedizin.de/resource/supplementary/12885_2009_2155_MOESM10_ESM.pdf/9460644)

A

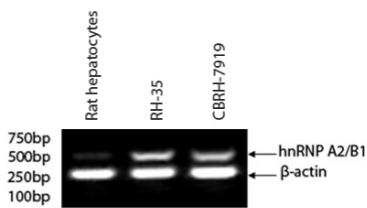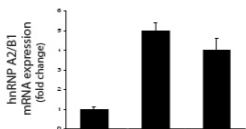

B

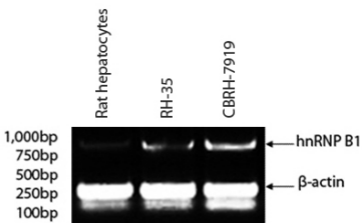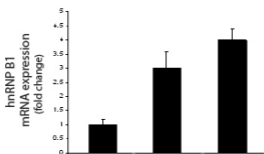

C

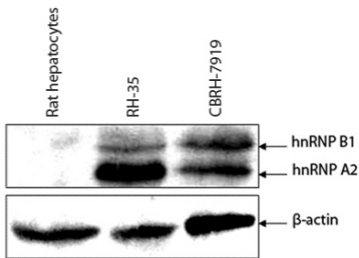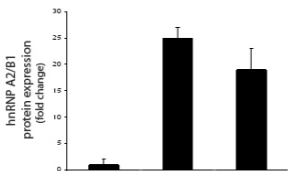

Supplement: MOESM10 [file 9460644]
